# Supplementary material for: An activity theory-based exploration of “Eyeland”, a task-based serious game for EFL visually impaired students
Source: PeerJ Comput Sci. 2025 Apr 23;11:e2631. doi: 10.7717/peerj-cs.2631 (PMC12190295; doi:10.7717/peerj-cs.2631)
Supplement: Supplemental Information 3 — Usability survey results, tests results, interviews notes, and observation findings. [file peerj-cs-11-2631-s003.xlsx]

## Sheet: Pre test and Post tests
	S: Sighted	VIS: visually impaired student			s: speaking	v: vocabulary	l: listening	r: reading	w: writing
		S					S					S					S
		Pre-test	Post test	App			Pre-test	Post test	App			Pre-test	Post test	App			Pre-test	Post test	App
	s	0	10	10		s	3	8	10		s	3	10	10		s	5	10	9
	v	5	10	10		v	5	8	10		v	5	8	10		v	7	6	9
	l	8	6	10		l	8	8	10		l	7	10	10		l	8	8	9
	r	4	4	10		r	5	8	10		r	6	8	10		r	6	0	9
	w	7	8	10		w	0	0	10		w	8	8	10		w	3	0	9
		4.8	7.6	10			4.2	6.4	10			5.8	8.8	10			5.8	4.8	9
		VIS					S					S					VIS
		Pre-test	Post test	App			Pre-test	Post test	App			Pre-test	Post test	App			Pre-test	Post test	App
	s	1	8	5		s	4	10	10		s	1	6	9		s	1	10	5
	v	4	8	5		v	6	8	10		v	5	6	9		v	3	8	5
	l	5	8	5		l	7	8	10		l	6	6	9		l	7	10	5
	r	7	7	5		r	6	0	10		r	6	10	9		r	8	5	5
	w	6	6	5		w	2	0	10		w	3	8	9		w	0	0	5
		4.6	7.4	5			5	5.2	10			4.2	7.2	9			3.8	6.6	5
		S					S					VIS					VIS
		Pre-test	Post test	App			Pre-test	Post test	App			Pre-test	Post test	App			Pre-test	Post test	App
	s	2	8	8		s	2	8	5		s	3	8	7		s	4	8	10
	v	3	8	8		v	4	8	5		v	5	8	7		v	7	8	10
	l	4	8	8		l	4	8	5		l	7	8	7		l	8	8	10
	r	5	10	8		r	6	10	5		r	8	8	7		r	7	10	10
	w	0	7	8		w	0	8	5		w	0	0	7		w	0	8	10
		2.8	8.2	8			3.2	8.4	5			4.6	6.4	7			5.2	8.4	10

## Sheet: Usability
Timestamp	Name	User	age	any disability?	If so, tell us what disability	How easy was the navigation	How clear were the instructions?	How would you rate the exercises and activities within the app?	Do you think that the app helped you learn English?	How useful were the accessibility features to use the app?	How would you rate the experience at the collaborative level?	Please rate your satisfaction with the app	What improvements would you like to do?
2023-12-05 14:46:33	Staicey	Guide	14	No		5	4	5	Sí	5	4	5
2023-12-05 14:47:30	Andres Noguera	artist	16	No		5	5	5	Sí	5	5	5	It is complete to me
2023-12-05 14:48:52	Fabián	Explorer	14	No		5	5	5	Sí	5	4	5
2023-12-05 14:51:05	Tania	Python	14	No		5	4	5	Sí	5	5	4	None. In general it is quite good. It helps a lot.
2023-12-05 14:53:03	Quelbin	Wolf	15	Sí	Low vision	4	5	3	Xd	5	4	4	Error in the change cards and the bottom is very empty
2023-12-05 14:55:00	María agüero	Phoenix	14	No		4	5	5	Sí	3	5	4	Letters can be dragged in the word-forming activity.
2023-12-05 14:55:18	John	sunse	16	No		4	5	4	Sí	5	5	5
2023-12-05 14:59:32	Juan	Ninja	14	Sí	Glaucoma	3	5	4	Sí	5	4	3	More accessibility buttons. Additional features
2023-12-05 14:59:44	Isabella rivero	astronaut	15	No		4	4	4	Sí	4	5	4	Improve the time I spend with the microphone recording
2023-12-05 15:00:06	Yancelis González	Leader	17	No		5	4	4	Sí	4	4	4	Nothing. Everything is ok
2023-12-05 15:00:10	Jesús López	dreamer	14	Sí	Total blindness	2	4	5	Sí	5	4	5	The way words are organized
2023-12-05 15:00:30	Maveric	Star	14	Sí	Retinal detachment	4	5	5	Sí	4	5	5	No comments

## Sheet: Disability description
ANO	JORNADA	GRADO_COD	GRUPO	DOC	TIPODOC	APELLIDO1	APELLIDO2	NOMBRE1	NOMBRE2	GENERO	FECHA_NACIMIENTO	DISCAPACIDAD
2023	MAÑANA	4	0403	1044648111	RC:REGISTRO CIVIL DE NACIMIENTO	MERCADO	CARDONA	ANDRES	CAMILO	MASCULINO	2012-10-27	DISCAPACIDAD VISUAL CEGUERA
2023	TARDE	7	0701	1044217936	TI:TARJETA DE IDENTIDAD	QUEVEDO	HERNANDEZ	JUAN	EDUARDO	MASCULINO	2008-07-23	DISCAPACIDAD VISUAL CEGUERA
2023	TARDE	9	0902	1064191223	TI:TARJETA DE IDENTIDAD	ERAZO	DURANGO	KELVIN		MASCULINO	2007-11-07	DISCAPACIDAD VISUAL BAJA VISIÓN IRREVERSIBLE
2023	TARDE	9	0902	1042585307	TI:TARJETA DE IDENTIDAD	LOPEZ	CASTRO	JESUS	DANIEL	MASCULINO	2008-08-23	DISCAPACIDAD VISUAL CEGUERA
2023	TARDE	10	1001	1041694894	TI:TARJETA DE IDENTIDAD	GONZALEZ	MARTINEZ	MABERICK	LINEY	FEMENINO	2008-05-25	DISCAPACIDAD VISUAL CEGUERA
2023	TARDE	11	1102	1044612697	TI:TARJETA DE IDENTIDAD	CAMACHO	GONZALEZ	ANDREA	CAROLINA	MASCULINO	2005-10-09	DISCAPACIDAD VISUAL BAJA VISIÓN IRREVERSIBLE

## Sheet: Observation Results
Class Category	Traditional Lesson Characteristics	Adjustments with Eyeland	Teachers' Engagement	Inclusivity and Student Experience
Class 1: Traditional EFL Lesson	Grammar-based isolated topics that barely match learning outcomes or student levels. Visual and printed tools with heavy teacher input and board support.	Teachers reluctant to engage with the app.	Teachers provided loads of input, with limited facilitation or monitoring of student progress.	Limited opportunities for interaction and authentic input, especially for visually impaired students.
Class 2: Eyeland-Mediated Lesson	Initial stage involves individual work focusing on vocabulary and functional grammar. Teachers facilitate and monitor progress instead of presenting content. Teacher left the room, and the principal stayed in class instead.	Significant adjustments made to lessons using Eyeland.	Teachers' roles shifted to facilitators and monitors of progress. Teacher left the room, and the principal stayed in class.	VIS students reported predominantly positive experiences. Accessible content expanded interaction and authentic input.
Class 3: Eyeland second mediated lesson	Despite aiming to align with CEFR levels, student placement based on grade rather than actual skills. Advanced topics studied regardless of skill level.	Introduction of new activity systems like Eyeland.	Teachers observed misalignment of certain activities with core topics, e.g., focusing on food types instead of basic grammar.	Improved motivation, engagement, and attitudes toward speaking and listening skills among students using Eyeland.
Additional Observations
The traditional lessons struggled with inclusivity, especially for VIS students, due to heavy reliance on visual and printed materials.		Implementing Eyeland involved changes in lesson plans, including class layout rearrangement and use of accessibility features like touch and voice commands.	Teachers needed more training and support to effectively use Eyeland, highlighting a reluctance to change from traditional methods.	Eyeland facilitated more inclusive classrooms by providing accessible content and tools, enhancing autonomy and self-monitoring for VIS students.
Designing accessible serious games requires understanding different disability categories and the impact on game use. Accessibility guidelines are challenging to incorporate.		Eyeland's accessibility features like portability, collaboration, and notification systems supported successful learning experiences for all students.	The division of labor before creating accessible games demands extensive work, emphasizing the need for thorough training and support for teachers.	Positive perceptions of Eyeland among VIS students were noted, with increased motivation and engagement, better attitudes towards speaking and listening skills.
Transcript 1: Traditional EFL Lesson (Class 1)
Setting:
Participants: 27 sighted students, 3 visually impaired students (VIS), and 1 teacher.
Lesson Focus: Grammar-based topics.
Lesson Interaction:
Teacher: “We will be focusing on past tense grammar. Here are some sentences. Please copy them down from the board.”
(Teacher writes examples on the board while explaining orally.)
VIS Student 1: “I can record it on my cellphone.”
Teacher (distracted): “I’ll explain again once everyone has copied the notes.”
Sighted Student 1 (whispers): “How do you spell ‘completed’?”
(The teacher continues writing, ignoring the whispering.)
VIS Student 2 (to a peer): “I don’t know what we’re supposed to be doing. I can’t see the examples.”
Sighted Student 2 (to a peer): “It’s so hard to stay focused on these topics. It feels repetitive.”
Teacher: “Please keep copying from the board. This is essential to understanding the grammar rules.”
VIS Student 3: “Can you tell us the sentence you’re writing? ”
Teacher (impatient): “Okay, I’ll read it aloud. ‘She had completed the task before it started raining.’”
Sighted Student 3: “We already did this type of sentence last week. Can we practice something else?”
Teacher: “It’s important to review these concepts before moving on. Let’s continue.”
VIS Student 1 (struggling): “Where is your cellphone?.”
Sighted Student 4: “I don’t understand what we’re supposed to be doing with these sentences.”
Teacher: “Just focus on writing them down for now. We will discuss the grammar rules after.”
VIS Student 2 (to the teacher): “Can I use something to help me?
Teacher (sighs): “I haven’t figured out how to use the app yet. Just try to listen carefully as I explain.”
Sighted Student 5: “Why don’t we use the app? It sounds better than writing on the board.”
Sighted Student 2: "Do you see any Internet around here?"
Teacher (reluctantly): “We’ll use the app in future lessons, but for today, we’ll stick with this.”
VIS Student 3 (frustrated): “Tell me what’s happening.”
Sighted Student 6 (whispers to a peer): “This lesson is so boring. We just copy notes all the time.”
Teacher (to the class): “Okay, let’s move on. Now, I’ll explain the grammar rules.” These are the pronouns: I, You, She, He, We…
Sighted Student 6: "Only verb to be"
Outcome:
Limited opportunities for interaction, especially for VIS students, who feel left out due to the teacher’s reluctance to engage with more inclusive methods.
Sighted students show some engagement, but many express boredom due to the repetitive and input-heavy nature of the lesson.
Overall, the traditional EFL lesson lacks inclusivity and engagement, with few authentic interactions.
Transcript 2: Eyeland-Mediated Lesson (Class 2)
Setting:
Participants: 27 sighted students, 3 visually impaired students (VIS), and the principal, as the teacher is absent.
Lesson Focus: Vocabulary and functional grammar using Eyeland tools.
Lesson Interaction:
Principal: “Good morning, class. Today, you’ll be using Eyeland for an exciting vocabulary exercise. We’ll also have some guests in class today: three researchers who will help us explore the app in a more interactive way. Please welcome them.”
(Students murmur, excited about the new activity.)
Researcher 1: “Hi, everyone! Eyeland is more than just an app. It’s an adventure! We’re going to help you use it in groups, where each of you will have a special role to play. Ready for the challenge?”
Sighted Student 1: “A game? That sounds fun!”
Researcher 2 (enthusiastic): “Exactly! We’ll split you into groups of four. In each group, one of you will be the ‘Super Hearing’ hero—this role is perfect for our visually impaired students who will use the screen reader to navigate the tasks. The rest of you will take on other roles like ‘Memory Pro’ for sighted learners, who will focus on remembering important information.”
VIS Student 1 (excited): “Super Hearing! That sounds awesome. I can finally use the screen reader to help my group. I have a tablet at home.”
Sighted Student 2: “I want to be the Memory Pro! I have a great memory for vocabulary.”
Researcher 3 (organizing): “Let’s organize into groups of four. Each group will work together to complete the tasks on Eyeland. Your objective is to imagine you're on an adventure. You’ll encounter different scenarios where your teamwork and individual strengths will help you win the game!”
(The students begin forming groups, with the researchers and the principal helping organize them into teams of four.)
Researcher 2: “Great job getting into groups! Now, let’s go over the roles again. Super Hearing, you’ll use the screen reader on Eyeland to guide your group. Memory Pro, you’ll focus on remembering the vocabulary that comes up. There’s also a ‘Task Leader’ who will make sure everyone stays on track, and finally, the ‘Monitor,’ who will check in with me to make sure your group is doing okay.”
VIS Student 2 (proudly): “I’m ready to use my Super Hearing powers! Shhh let me listen”
Sighted Student 3 (confident): “I’m the Task Leader. I’ll make sure we don’t fall behind.”
Researcher 1: “Fantastic! Now, I want everyone to open the Eyeland app. You’ll find the first scenario waiting for you. It’s a vocabulary challenge. Your goal is to complete the tasks using your roles. Super Hearing, you should activate the screen reader now.”
VIS Student 3 (activating the screen reader): “The screen reader is working. I can hear all the instructions clearly!”
Sighted Student 4 (to the Task Leader in their group): “I’ve got the first word down. It’s ‘mangrove.’”
Researcher 3 (monitoring): “How’s everyone doing so far? Remember, if you get stuck, work together as a team. Super Hearing, you can help your group by listening to the details carefully and guiding them.”
VIS Student 1: “I can hear the next word. It’s ‘road.’ Let’s add that to our list.”
Sighted Student 5 (as Memory Pro): “Got it! I’ll keep track of all the words.”
Researcher 2 (checking in with a group): “Great job! Task Leader, how’s your group doing? Are you keeping everyone organized?”
Sighted Student 6 (as Task Leader): “We’re doing okay, but the next task seems harder. We need to match the words to their definitions.”
Researcher 1 (guiding): “Super Hearing, use your screen reader to help with the definitions. You’ll hear them one by one. Work with the Memory Pro to match the words.”
VIS Student 2 (focused): “The screen reader says ‘collaboration means working together.’”
Memory Pro (Sighted Student 7): “I’ll match that one! Let’s move to the next word.”
Principal (walking around the room): “I see a lot of great teamwork happening. Keep it up, everyone!”
Researcher 3: “Remember, this is a team effort. Super Hearing, you’re crucial in guiding the group through this adventure. Use your powers to lead them through the challenges.”
VIS Student 3 (feeling empowered): “I can hear all the instructions clearly. I’ll guide my group!”
Task Leader (Sighted Student 8): “What’s the next word, Super Hearing?”
VIS Student 1 (listening): “It’s ‘manatee.’ Like in Spanish.”
Memory Pro (Sighted Student 9): “Got it! I’ll remember that. We’re doing great!”
Researcher 2 (smiling): “You’re on the right track! Eyeland isn’t just about answering questions; it’s about working together and using your strengths to solve problems. Keep going!”
Sighted Student 10 (Monitor): “We’ve completed the first challenge! Should I check in with the teacher?”
Researcher 3 (encouraging): “Yes, great job! Monitors, come check in with me and let me know how your groups are doing. Are there any challenges you need help with?”
Sighted Student 11 (Monitor): “Our group is working well, but the definitions are a bit tricky.”
Researcher 1: “No problem. Remember, use your team’s strengths. Super Hearing, listen carefully to the screen reader, and Memory Pro, focus on remembering those tricky definitions.”
VIS Student 3: “I’m listening! The next word is ‘river.’ It means using scientific knowledge for practical purposes.”
Memory Pro (Sighted Student 12): “We’ve got this! I’ll remember it.”
Principal (checking on a different group): “This group is doing well! It’s great to see all of you working together.”
Outcome:
Students are highly engaged in the adventure-themed learning session, taking on specific roles and responsibilities within their groups.
VIS students are empowered by their "Super Hearing" roles, using the screen reader to guide their groups and participate fully.
Researchers ensure the groups are organized, providing continuous guidance and checking in on progress, fostering teamwork and problem-solving.
The group-based approach increases collaboration, communication, and engagement across both sighted and visually impaired students.
Transcript 3: Eyeland-Mediated Lesson – Animal Adventure Theme
Setting:
Participants: 27 sighted students, 3 visually impaired students (VIS), 1 teacher, and the Eyeland app.
Lesson Focus: Vocabulary and sentence structure based on animals, where they live, what they eat, and their physical descriptions. The lesson is designed as a collaborative adventure, using the Eyeland app.
Lesson Interaction:
Teacher:
"Today, we're going on an adventure with Eyeland to meet some amazing animals. Each group will work together using Eyeland to explore where these animals live, how they look, and what they eat. You’ll take on different roles to help your group succeed. Remember, this is an interactive journey, so make sure to listen carefully and use your teamwork skills!"
Researcher 1:
"Let’s get into your groups. As before, each group will have special roles: 'Super Hearing' for our VIS students, 'Memory Pro' for sighted learners, and other important roles to help complete the tasks. Let’s start with Otto, the Osprey!"
VIS Student 1 (using screen reader):
"The first question is: Where does Otto, the Osprey live?"
Sighted Student 1 (as Memory Pro):
"He lives in the mangroves!"
VIS Student 2 (Super Hearing):
"Correct! Now let’s move on to how Otto looks."
Sighted Student 2:
"Otto has big wings."
VIS Student 3:
"Yes, that’s the right answer. The screen reader confirmed it!"
Teacher (circulating):
"Great teamwork! Keep following the app’s prompts and remember to support each other."
Researcher 2:
"Now, we’ll meet Aldo, the alligator. Ready for the next adventure? Let’s figure out where Aldo lives and what he eats!"
VIS Student 1:
"The app asks: Where does Aldo, the alligator live?"
Sighted Student 3 (as Task Leader):
"He lives in the river!"
VIS Student 2 (using screen reader):
"Correct! Next, it’s asking what Aldo eats. Let’s find out."
Sighted Student 4:
"He eats meat!"
VIS Student 3:
"That’s right, the screen reader says we’ve got it!"
Teacher (prompting):
"Great progress, everyone! Now let's move on to Lina, the lizard. Let’s see how she looks and what she eats."
VIS Student 2:
"The first question: How does Lina look like?"
Sighted Student 5 (Memory Pro):
"She has a long tail!"
VIS Student 1:
"Got it! The next question is: What does Lina eat?"
Sighted Student 6:
"She eats insects!"
Researcher 3 (observing the group):
"You’re doing well! Remember to listen closely and work together to figure out the correct answers."
Teacher:
"Now let’s learn about Molly, the manatee. You’ll be asked where she lives and how she looks."
VIS Student 3 (using the screen reader):
"Where does Molly, the manatee live?"
Sighted Student 7:
"She lives in the swamp!"
VIS Student 1:
"Yes, that’s correct. What’s next?"
Sighted Student 8:
"The app is asking: How does Molly look like?"
VIS Student 2 (using screen reader):
"She has big teeth!"
Sighted Student 9:
"We got it right again! Let’s keep going."
Researcher 1:
"Alright, back to Aldo, the alligator. This time we’ll describe how he looks."
VIS Student 2:
"The app asks: How does Aldo look like?"
Sighted Student 10:
"He has sharp claws!"
VIS Student 3 (checking the screen reader):
"Correct! The next part is about what Aldo eats again, let’s review."
Sighted Student 11:
"He eats fish…hmm no...meat, we already learned that!"
Researcher 2 (walking around the room):
"Great job! You’re all doing excellent work. Let’s continue and move on to Otto again."
Teacher:
"Let’s see if we remember what Otto eats. Can someone recall what we learned about his diet?"
VIS Student 1 (Super Hearing):
"The app asks: What does Otto eat?"
Sighted Student 12 (Memory Pro):
"He eats fish!" What animal is Otto?
VIS Student 3:
"Yes, we’re right!"
Researcher 3 (observing):
"Excellent! You’ve completed all the animal adventure challenges. Now, let’s go over the vocabulary words we worked on."
Outcome:
Students were fully engaged, particularly in using the Eyeland app to guide their learning adventure.
The inclusion of roles like "Super Hearing" for visually impaired students and "Memory Pro" for sighted students made learning collaborative and interactive.
The vocabulary and sentence structure around the animals reinforced the students' learning, with each group member contributing their knowledge to complete the tasks.
The researchers and the teacher facilitated group work, supporting both VIS and sighted students in their roles, ensuring inclusivity and effective participation.

## Sheet: Interview
Teachers' Interventions	Identified Aspect	Details	Teachers' Quotes
Gamification	Course and Tools	Teachers mentioned that gamification and the tools used are not sufficient to mediate between the subject and the object of the course. They noted that the current tools are limited and not adequately integrated into the curriculum, affecting the effectiveness of learning.	"It's my first time using apps", "I need more training"
Accessibility for Visually Impaired Students	Accessibility	Teachers highlighted the lack of digital materials and suitable devices to enhance lessons for visually impaired students. Currently, there is only one material provided by the government, which is not enough. The lack of specific technological resources hinders the inclusion and learning of these students.	"I don't know how to use Eyeland"
Mobile Language Learning	Participation	Teachers observed that the lack of participation during the app implementation might be because they didn't see the potential of the tool for helping students with disabilities. Additionally, they mentioned that the use of mobile apps for language learning is not sufficiently developed, and students are not motivated to participate due to a lack of familiarity and training in these tools.	"I can't teach the class because I have other planning tasks to do"
Transcript 1: Interview with 4 Teachers on Traditional English Class
Teacher 1:
Question: Describe a regular English class. Phases/stages.
Answer: "A regular English class follows a structure. We start with a warm-up or review of the previous lesson, then move on to new content presentation—usually grammar or vocabulary—then controlled practice with worksheets or board activities, followed by free practice in groups or pairs, and finish with a short assessment or summary."
Question: What resources are available to teach your traditional lessons?
Answer: "We mostly use textbooks and printed worksheets provided by the government. There are some audio resources, but they’re limited. For visually impaired students, there’s only one material, and it’s not nearly enough. I wish we had more digital resources."
Teacher 2:
"Yes, I agree. The lack of digital materials and tools, especially for visually impaired students, is a huge challenge. Right now, all we have are paper-based materials that don’t support inclusive learning. We don’t have suitable devices to help them access the lessons better."
Quote: "I don't know how to use Eyeland."
Question: What are the characteristics of the classroom where you teach English?
Answer: "It’s a traditional classroom setup with desks in rows and a chalkboard. We don’t have technology like smartboards or projectors, and any visual aids we use, like posters, are not accessible to visually impaired students. It’s frustrating because I want to do more, but I don’t have the tools."
Question: What tools and materials are accessible?
Answer: "As I mentioned earlier, we have mostly textbooks and printed worksheets. No specialized technology or digital devices for visually impaired students."
Question: What procedures do you follow when supporting the visually impaired students?
Answer: "I try to give them verbal instructions and let them work with peers, but I feel like it’s not enough. There’s only so much you can do without proper materials or tools."
Teacher 3:
Quote: "It's my first time using apps."
"I don’t know how to fully support them using technology, especially since I’m not familiar with apps or digital tools myself. I need more training."
Question: Have you used mobile learning in your classroom?
Answer: "No, not really. Mobile learning hasn’t been integrated into our lessons, and I’m not sure how to implement it effectively, especially with no prior training or experience."
Question: Have you used task-based learning in class? How frequently do you use it?
Answer: "We do task-based learning maybe once or twice a month. It requires more preparation than usual, and we lack the necessary resources to implement it effectively. It’s hard to use without interactive materials."
Question: What are the common problems and limitations that you encounter in your traditional lessons?
Answer: "The biggest issue is the lack of accessible materials for visually impaired students. Also, students tend to lose focus because the lessons are too structured and not engaging enough. We don’t have any tools to make lessons more dynamic."
Teacher 2:
Quote: "I need more training."
"Gamification would help here, but the tools we use aren’t sufficient for that. I’ve heard about apps that make learning more interactive, but I’ve never used them because I don’t know how."
Question: What are the roles of the other students while interacting with the visually impaired students?
Answer: "They’re generally helpful. Sometimes they guide their visually impaired classmates during group activities, but it’s still not enough. We need more structured support."
Question: How does the school support the process with visually impaired students?
Answer: "There’s very little support from the school. They provide extra time for exams, but no technological assistance or specialized training for teachers."
Question: What skills are commonly reinforced in a regular class?
Answer: "We focus on grammar, vocabulary, and sometimes reading and writing. Listening and speaking are harder to practice because we lack audio materials."
Question: What are your expectations of the use of an app in your class?
Answer: "I hope an app could provide more accessible content, especially for visually impaired students. But to be honest, I’d need training before I could confidently use one."
Question: Do you believe that a serious game might work in terms of support for learning? Why or why not?
Answer: "It could work if designed properly. Games would definitely engage students more, but only if they’re accessible and easy to use. Without the right training, though, I’m not sure how effective it would be."
Transcript 2: Interview with 3 Teachers on Eyeland’s Use in Classes
Teacher 1:
Question: What were your impressions of Eyeland’s use within the classes?
Answer: "I think Eyeland helped make lessons more interactive and fun. The visually impaired students enjoyed it because they could follow along more easily with the screen reader feature. However, we had some issues with the internet, and it took a while to get comfortable using it."
Teacher 2:
"For me, it was a mixed experience. While the app made it easier for visually impaired students to participate, I found it hard to integrate into my regular lessons because the syllabus isn’t aligned with the app’s content. It feels like I’m adding extra tasks instead of blending it with what I already teach."
Question: What worked well with how students used Eyeland?
Answer: "The feedback system was great. Students could immediately see where they made mistakes and fix them. The interactive nature of the app kept them engaged, especially the visually impaired students who often feel left out during traditional lessons."
Question: What did not work well about how students used Eyeland?
Answer: "The technical constraints were a big issue. The app sometimes froze due to poor internet, and not all students were comfortable using it. Also, it required a lot of teacher oversight. I couldn’t just let them use it while attending to other tasks."
Quote: "I don't know how to use Eyeland."
Question: What do you like about the Eyeland technology?
Answer: "I love how inclusive it is. The app has features like the screen reader that make it easy for visually impaired students to participate. It also gives students immediate feedback, which is really helpful for language learning."
Question: What do you think are the current technical constraints of Eyeland?
Answer: "The internet is the biggest problem. Without a stable connection, the app doesn’t work properly, and it disrupts the lesson. Also, it requires a lot of planning, and it doesn’t match our syllabus perfectly, so I feel like I’m spending too much time adapting lessons."
Teacher 1:
Quote: "I can't teach the class because I have other planning tasks to do."
"It’s just hard to balance everything. I want to use the app, but lesson planning is already time-consuming. With the additional work needed to make Eyeland fit the syllabus, I sometimes feel like it’s too much."
Question: What would you like Eyeland to be able to do that does not currently seem possible?
Answer: "If it could work offline, that would solve so many problems. Also, more pre-made lesson plans would be great—especially ones that align with our syllabus. That way, I wouldn’t have to create new lessons from scratch just to use the app."
Question: Would you like to use Eyeland in the future? If so, what for?
Answer: "Yes, I would. I think it’s great for engaging students, especially visually impaired ones. I’d use it more for interactive grammar and vocabulary activities if the technical issues could be fixed."
Question: What impact does Eyeland have on lessons?
Answer: "It makes lessons more dynamic and interactive. Students seem to enjoy learning more when they’re using the app, but the technical issues and extra planning sometimes make it hard to use regularly."
Question: What aspects are necessary to remediate the lessons through the app?
Answer: "The first thing is training. Teachers need to feel confident using the app, and we need lesson plans that match our syllabus. Also, we need more reliable internet access if we’re going to keep using it."
Teacher 2:
Quote: "It's my first time using apps."
"If we get more training, I believe the app could become an important tool in our teaching. But right now, it’s hard to fully implement it without more support from the school."
