# Supplementary material for: An activity theory-based exploration of “Eyeland”, a task-based serious game for EFL visually impaired students
Source: PeerJ journal article supplement (doi:10.7717/peerj-cs.2631), 2025-04-23
Supplement: Thematic_Analysis_Appendix.pdf [file Thematic_Analysis_Appendix.pdf]

## Thematic analysis phases draft

| Phase                | Action                                                                                     | Example Outcome                                                                                                              |
|----------------------|--------------------------------------------------------------------------------------------|------------------------------------------------------------------------------------------------------------------------------|
| Initial Coding       | Assign descriptive labels to data extracts to summarize their content.                     | - "Intrinsic Motivation" coded as <i>desire to engage with Eyeland</i> .                                                     |
|                      |                                                                                            | - "Technical Difficulties" coded as <i>issues with software or hardware usability</i> .                                      |
| Searching for Themes | Group related codes into candidate themes, organizing them hierarchically.                 | - <i>Engagement</i> : Includes codes such as <i>desire to engage, participation, and enjoyment</i> .                         |
|                      |                                                                                            | - <i>Accessibility Issues</i> : Includes <i>technical issues</i> and <i>interface usability</i> .                            |
| Reviewing Themes     | Verify themes against the dataset to ensure relevance and coherence.                       | - Refining <i>Engagement</i> to emphasize active participation and its link to intrinsic motivation.                         |
|                      |                                                                                            | - Merging <i>Technical Difficulties</i> and <i>Support Limitations</i> into a broader theme: <i>Accessibility Barriers</i> . |
| Refining Themes      | Clearly define each theme, ensuring distinctiveness and alignment with research questions. | - <i>Engagement</i> : Captures motivational, emotional, and interactive aspects.                                             |
|                      |                                                                                            | - <i>Accessibility Barriers</i> : Focuses on usability challenges and solutions.                                             |
|                      |                                                                                            | - <i>Impact on Teaching</i> : Highlights EFL improvements and integration challenges.                                        |

| Phase                | Action                                                                                           | Example Outcome                                                                                                  |
|----------------------|--------------------------------------------------------------------------------------------------|------------------------------------------------------------------------------------------------------------------|
| Producing the Report | Create a detailed narrative explaining each theme, supported by data extracts and subcategories. | - <i>Engagement</i> : Students reported high levels of excitement (“A game? That sounds fun!”).                  |
|                      |                                                                                                  | - <i>Accessibility Barriers</i> : Students highlighted issues with screen readers and insufficient training.     |
|                      |                                                                                                  | - <i>Impact on Teaching</i> : Teachers discussed the need for better curriculum alignment with Eyeland's design. |

### Example Detailed Subsections from the Report

#### 1. Engagement

- **Intrinsic Motivation**: "Students expressed a strong desire to engage with Eyeland due to its gamified structure."
- **Active Participation**: "Participants reported active roles in team-based challenges, fostering collaboration and focus."

#### 2. Accessibility Barriers

- **Technical Difficulties**: "Poor internet connectivity hindered seamless gameplay for several students."
- **User-Friendly Interface Design**: "While intuitive for many, visually impaired students faced challenges without appropriate adjustments."

#### 3. Impact on Teaching

- **Curriculum Adaptability**: "Teachers noted difficulty aligning Eyeland activities with standardized lesson plans, citing increased preparation time."

## Thematic analysis final coding

| Category             | Subcategory                               | Description                                                                                                                        |
|----------------------|-------------------------------------------|------------------------------------------------------------------------------------------------------------------------------------|
| Engagement           | Intrinsic Motivation                      | Students' internal desire to participate and learn through the 'Eyeland' game.                                                     |
|                      | Active Participation                      | Level of students' involvement and activity during the game's tasks.                                                               |
|                      | Enjoyment and Fun                         | Feelings of pleasure and entertainment experienced while interacting with the game.                                                |
|                      | Social Interaction                        | Collaboration and communication with other students while using the application.                                                   |
|                      | Attention and Focus                       | Students' ability to stay concentrated on the game's tasks.                                                                        |
|                      | Repeat Usage                              | Frequency with which students choose to play 'Eyeland' again.                                                                      |
|                      | Positive Feedback                         | Favorable comments from students about their experience with the game.                                                             |
| Accessibility Issues | Technical Difficulties                    | Hardware or software issues affecting students' use of the game.                                                                   |
|                      | Compatibility with Assistive Technologies | Integration of the game with support devices and software for visually impaired students (e.g., screen readers, Braille displays). |
|                      | Clarity of Auditory Instructions          | Ease with which students understand the verbal instructions provided by the game.                                                  |
|                      | Cognitive Load                            | Mental effort required to navigate and complete tasks in the game.                                                                 |
|                      | User-Friendly Interface Design            | Accessibility and usability of the game's navigation and control elements for visually impaired users.                             |
|                      | Physical Limitations                      | Challenges related to visual impairment that affect interaction with the game (e.g., tactile sensitivity).                         |
|                      | Insufficient Technical Support            | Lack of assistance or resources to resolve technical issues encountered by users.                                                  |
| Impact on Teaching   | Improvement in EFL Skills                 | Progress in listening, speaking, reading, and writing skills in English as a Foreign Language (EFL).                               |

| Category             | Subcategory                               | Description                                                                                                         |
|----------------------|-------------------------------------------|---------------------------------------------------------------------------------------------------------------------|
|                      | <b>Application of Theory to Practice</b>  | How the game facilitates understanding and application of theoretical concepts in practical learning situations.    |
|                      | <b>Increased Autonomy</b>                 | Students' ability to learn and solve problems independently through the game.                                       |
|                      | <b>Curriculum Adaptability</b>            | Ease of integrating 'Eyeland' into the curriculum and aligning it with existing educational goals.                  |
|                      | <b>Changes in Teaching Methodology</b>    | Modifications in teaching strategies by educators when incorporating the game into their classes.                   |
|                      | <b>Formative Assessment</b>               | Use of the game as a tool to monitor and evaluate students' progress in real-time.                                  |
|                      | <b>Teacher Feedback</b>                   | Teachers' opinions and perceptions about the game's effectiveness and usefulness in the teaching-learning process.  |
| <b>Emerging Data</b> | <b>Overall Satisfaction</b>               | General level of satisfaction of students with the experience of using 'Eyeland'.                                   |
|                      | <b>Cultural or Linguistic Barriers</b>    | Obstacles related to the game's cultural or linguistic content that may affect students' understanding or interest. |
|                      | <b>Personalized Learning</b>              | Ability to adapt the game to students' individual needs and preferences.                                            |
|                      | <b>Confidence in Technological Skills</b> | Students' confidence and competence in using digital tools for learning.                                            |
|                      | <b>Improvement Suggestions</b>            | Recommendations from users for future updates or improvements to the game.                                          |

| Category             | Subcategory                               | Quotes from Interviews                                                                                                                                                                |
|----------------------|-------------------------------------------|---------------------------------------------------------------------------------------------------------------------------------------------------------------------------------------|
| Engagement           | Active Participation                      | "The interactive nature of the app kept them engaged, especially the visually impaired students who often feel left out during traditional lessons."                                  |
|                      | Enjoyment and Fun                         | "I think Eyeland helped make lessons more interactive and fun. The visually impaired students enjoyed it because they could follow along more easily with the screen reader feature." |
|                      | Positive Feedback                         | "The feedback system was great. Students could immediately see where they made mistakes and fix them."                                                                                |
| Accessibility Issues | Technical Difficulties                    | "The technical constraints were a big issue. The app sometimes froze due to poor internet, and not all students were comfortable using it."                                           |
|                      |                                           | "The internet is the biggest problem. Without a stable connection, the app doesn't work properly, and it disrupts the lesson."                                                        |
|                      | Compatibility with Assistive Technologies | "The app has features like the screen reader that make it easy for visually impaired students to participate."                                                                        |
|                      | User-Friendly Interface Design            | "It could work if designed properly. Games would definitely engage students more, but only if they're accessible and easy to use."                                                    |
|                      | Insufficient Technical Support            | "If we get more training, I believe the app could become an important tool in our teaching. But right now, it's hard to fully implement it without more support from the school."     |
| Impact on Teaching   | Curriculum Adaptability                   | "It doesn't match our syllabus perfectly, so I feel like I'm spending too much time adapting lessons."                                                                                |

|                      |                                           |                                                                                                                                                                                                |
|----------------------|-------------------------------------------|------------------------------------------------------------------------------------------------------------------------------------------------------------------------------------------------|
|                      | <b>Changes in Teaching Methodology</b>    | "Gamification would help here, but the tools we use aren't sufficient for that. I've heard about apps that make learning more interactive, but I've never used them because I don't know how." |
|                      | <b>Teacher Feedback</b>                   | "The first thing is training. Teachers need to feel confident using the app, and we need lesson plans that match our syllabus."                                                                |
| <b>Emerging Data</b> | <b>Overall Satisfaction</b>               | "Students seem to enjoy learning more when they're using the app."                                                                                                                             |
|                      | <b>Confidence in Technological Skills</b> | "It's my first time using apps."                                                                                                                                                               |
|                      |                                           | "I don't know how to fully support them using technology, especially since I'm not familiar with apps or digital tools myself."                                                                |
|                      | <b>Improvement Suggestions</b>            | "If it could work offline, that would solve so many problems. Also, more pre-made lesson plans would be great—especially ones that align with our syllabus."                                   |

|                             |                                                                                                                                         |
|-----------------------------|-----------------------------------------------------------------------------------------------------------------------------------------|
| <b>Engagement</b>           |                                                                                                                                         |
| <b>Subcategory</b>          | <b>Quote from observation</b>                                                                                                           |
| <b>Intrinsic Motivation</b> | "Super Hearing! That sounds awesome. I can finally use the screen reader to help my group. I have a tablet at home."                    |
| <b>Active Participation</b> | "The app asks: What does Otto eat?"                                                                                                     |
| <b>Enjoyment and Fun</b>    | "A game? That sounds fun!"                                                                                                              |
| <b>Social Interaction</b>   | "Great teamwork! Keep following the app's prompts and remember to support each other."                                                  |
| <b>Attention and Focus</b>  | "I'm listening! The next word is 'river.' It means using scientific knowledge for practical purposes."                                  |
| <b>Repeat Usage</b>         | "Yes, we're right!"                                                                                                                     |
| <b>Positive Feedback</b>    | "Fantastic! Now, I want everyone to open the Eyeland app. You'll find the first scenario waiting for you. It's a vocabulary challenge." |
| <b>Accessibility Issues</b> |                                                                                                                                         |

| Subcategory                               | Quote from Observations                                                                                                                                                           |
|-------------------------------------------|-----------------------------------------------------------------------------------------------------------------------------------------------------------------------------------|
| Technical Difficulties                    | "The technical constraints were a big issue. The app sometimes froze due to poor internet, and not all students were comfortable using it."                                       |
| Compatibility with Assistive Technologies | "The app has features like the screen reader that make it easy for visually impaired students to participate."                                                                    |
| User-Friendly Interface Design            | "It could work if designed properly. Games would definitely engage students more, but only if they're accessible and easy to use."                                                |
| Insufficient Technical Support            | "If we get more training, I believe the app could become an important tool in our teaching. But right now, it's hard to fully implement it without more support from the school." |

|                    |
|--------------------|
| Impact on Teaching |
|--------------------|

| Subcategory                     | Quote from observations                                                                                                                                                                        |
|---------------------------------|------------------------------------------------------------------------------------------------------------------------------------------------------------------------------------------------|
| Curriculum Adaptability         | "It doesn't match our syllabus perfectly, so I feel like I'm spending too much time adapting lessons."                                                                                         |
| Changes in Teaching Methodology | "Gamification would help here, but the tools we use aren't sufficient for that. I've heard about apps that make learning more interactive, but I've never used them because I don't know how." |
| Teacher Feedback                | "The first thing is training. Teachers need to feel confident using the app, and we need lesson plans that match our syllabus."                                                                |

|               |
|---------------|
| Emerging Data |
|---------------|



| Subcategory                        | Quote from observations                                                                                                                                      |
|------------------------------------|--------------------------------------------------------------------------------------------------------------------------------------------------------------|
| Overall Satisfaction               | "Students seem to enjoy learning more when they're using the app."                                                                                           |
| Confidence in Technological Skills | "I don't know how to fully support them using technology, especially since I'm not familiar with apps or digital tools myself."                              |
| Improvement Suggestions            | "If it could work offline, that would solve so many problems. Also, more pre-made lesson plans would be great—especially ones that align with our syllabus." |

#### Emerging Data from focus groups

| Subcategory             | Comment                                                |
|-------------------------|--------------------------------------------------------|
| Overall Satisfaction    | "It is complete to me."                                |
|                         | "In general it is quite good. It helps a lot."         |
| Improvement Suggestions | "Letters can be dragged in the word-forming activity." |
| Overall Satisfaction    | "Nothing. Everything is ok."                           |
| No Feedback Provided    | "No comments."                                         |
